1 **Protection of Hamsters Challenged with SARS-CoV-2 Variants of Concern by**  
2 **Two Doses of MVC-COV1901 Vaccine Followed by a Single Dose of Beta Variant**  
3 **Version of MVC-COV1901**

4

5 Tsun-Yung Kuo<sup>1,2</sup>, Chia-En Lien<sup>1,3</sup>, Yi-Jiun Lin<sup>1</sup>, Meei-Yun Lin<sup>1</sup>, Chung-Chin Wu<sup>1</sup>, Wei-Hsuan  
6 Tang<sup>1</sup>, John D. Campbell<sup>4</sup>, Paula Traquina<sup>4</sup>, Ya-Shan Chuang<sup>1</sup>, Luke Tzu-Chi Liu<sup>1</sup>, Charles Chen<sup>1,5\*</sup>

7

8 <sup>1</sup>Medigen Vaccine Biologics Corporation, Taipei City, Taiwan

9 <sup>2</sup>Department of Biotechnology and Animal Science, National Ilan University, Yilan County, Taiwan

10 <sup>3</sup> Institute of Public Health, National Yang-Ming Chiao Tung University, Taipei City, Taiwan

11 <sup>4</sup>Dynavax Technologies, Emeryville, CA 94608, USA

12 <sup>5</sup>Temple University, Philadelphia, PA 19122, USA

13

14 \*Corresponding author: [charles@medigenvac.com](mailto:charles@medigenvac.com)

15

16

17

18

19

20

21

22

23

24

25

26

27

28

29

30

## 31 **Abstract**

32       The current fight against COVID-19 is compounded by the Variants of Concern (VoCs), which can  
33 diminish the effectiveness of vaccines and potentially increase viral transmission and severity of disease.  
34 MVC-COV1901 is a protein subunit vaccine based on the prefusion SARS-CoV-2 spike protein (S-2P) and is  
35 adjuvanted with CpG 1018 and aluminum hydroxide. In this study, we used the Delta variant to challenge  
36 hamsters inoculated with S-2P from the Wuhan wildtype and the Beta variant in two-dose or three-dose  
37 regimens. Two doses of wildtype S-2P followed by the third dose of Beta variant was shown to induce the  
38 highest neutralizing antibody titer against live SARS-CoV-2 of the wildtype as well as all current VoCs. All  
39 regimens of vaccination were able to protect hamsters from SARS-CoV-2 Delta variant challenge and resulted  
40 in reduced lung live virus titer and pathology. Three doses of vaccination also significantly reduced lung viral  
41 RNA titer, regardless of whether the wildtype or Beta variant S-2P was used as the third dose. Based on the  
42 immunogenicity and viral challenge data, two doses of wildtype S-2P followed by the third dose of Beta  
43 variant S-2P induced a broad and potent immune response against the Alpha, Beta, Gamma, and Delta  
44 variants.

## 45 **Introduction**

46 As of September 2021, the COVID-19 pandemic shows no sign of abating despite the fact that over five  
47 billion doses of vaccines have been administered worldwide. The emergence of variants has undoubtedly  
48 played an important role in facilitating the global spread of COVID-19. Thus far, WHO has listed four VoCs:  
49 Alpha (B.1.1.7), Beta (B.1.351), Gamma (P.1), and Delta (B.1.617.2), and five Variants of Interest (VoIs): Eta  
50 (B.1.525), Iota (B.1.526), Kappa (B.1.617.1), Lambda (C.37), and Mu (B.1.621) [1]. In addition to increased  
51 transmission, the VoCs are known to reduce the *in vitro* neutralizing capability of currently available vaccines  
52 through mutations on the spike protein, especially in the receptor binding domain (RBD) [2-4]. These *in vitro*  
53 data have been shown to have a tangible impact on public health with reports of diminished vaccine efficacy,  
54 particularly among those infected with the Beta and Delta variants [5-8]. Rather than developing new vaccines  
55 for each variant or trying to create a universal SARS-CoV-2 vaccine, booster vaccines may be the most  
56 effective way to protect against these variants [9-11]

57 Medigen's MVC-COV1901 is a subunit vaccine based on a stabilized pre-fusion S-2P protein adjuvanted  
58 with CpG 1018 and aluminum hydroxide [12]. This vaccine has been shown to be safe and highly  
59 immunogenic in both hamster challenge studies and clinical trials [13-15], and has been approved for  
60 emergency use in Taiwan. The vaccine is given intramuscularly as two doses separated by four weeks [16].  
61 We have previously shown that two doses induce neutralizing antibodies against SARS-CoV-2 variants with a  
62 tendency of higher immunogenicity at higher dose levels [17]. We have also found that a third dose of this  
63 vaccine administered to rats increased neutralizing antibody titers against the Beta variant compared to just  
64 two doses [17]. For the current study we expanded on our previous findings to investigate the immunogenicity  
65 of third dose booster against VoCs.

66

67

68

69

## 70 **Results**

### 71 **Induction of neutralizing antibodies against VoCs in hamsters immunized with two doses of S-2P** 72 **derived from original MVC-COV1901, Beta variant, or a bivalent combination of both.**

73 We have previously shown that there was approximately a 7-fold reduction in the neutralizing antibody  
74 titer against the Beta variant in the sera of individuals who received two doses of MVC-COV1901 during a  
75 phase I trial [20]. We subsequently developed a Beta variant version of S-2P produced by a stable CHO cell  
76 clone and adjuvanted with 750 µg of CpG 1018 and 375 µg of aluminum hydroxide. We have previously  
77 established that two doses using one-fifth the amount of either low dose or high dose of MVC-COV1901 were  
78 sufficient to protect hamsters from SARS-CoV-2 infection [13]. Since the Delta variant has become prevalent  
79 worldwide, we investigated the protective effect of MVC-COV1901 derived from Wuhan wildtype (W), its  
80 Beta variant version (B) of S-2P, and the wildtype/Beta S-2P bivalent vaccine in hamsters challenged with the  
81 Delta variant. We first examined the neutralizing antibody titers from hamsters immunized with two doses of  
82 1 µg wildtype S-2P adjuvanted with 150 µg CpG 1018 and 75 µg aluminum hydroxide (Group A shown as W  
83 + W). As shown in Figure 2, at five weeks after the second injection, Group A hamsters showed a reciprocal  
84 50% neutralizing antibody titer (NT<sub>50</sub>) GMT of 2201, 581, 166, 193, and 742 against the wildtype, Alpha,  
85 Beta, Gamma, and Delta variants, respectively. Compared to the neutralizing titer against the wildtype, those  
86 against the Alpha, Beta, Gamma, and Delta variants showed a 3.79-, 13.30-, 11.39-, and 2.97-fold reduction,  
87 respectively. This demonstrated that two doses of S-2P derived from wildtype was relatively effective against  
88 the Alpha and Delta variants. However, the effectiveness was significantly reduced against the Beta and  
89 Gamma variants.

90 At the same time, we examined the neutralizing antibody titers from hamsters immunized with two doses  
91 of 1 µg of the Beta variant version of S-2P combined with 150 µg CpG 1018 and 75 µg aluminum hydroxide -  
92 Group B (B + B). Figure 2 shows that two doses of the adjuvanted Beta variant S-2P induced a satisfactory  
93 NT<sub>50</sub> GMT of 681 and 417 against the wildtype and Beta variant, respectively. However, the neutralizing  
94 titers of this regimen was less than desirable against the Alpha, Gamma, and Delta variants that were 181, 219  
95 and 182, respectively.

96 We also explored the neutralizing antibody responses of bivalent vaccine (wildtype + Beta variant) in  
97 Group C hamsters [shown as (W + B) + (W + B)]. The bivalent vaccine induced a similar degree of  
98 neutralizing antibody titers against the wildtype, Alpha, and Delta variants to that of the W+W group. This  
99 combination fared better against the Beta and Gamma variants than that of the W+W group; however,  
100 neutralization titer against these variants in several individual hamsters were less than 200.

101

102 **Induction of neutralizing antibodies against VoCs in hamsters immunized with two doses of**  
103 **MVC-COV19 combined with a third dose of MVC-COV1901 or its Beta variant version of S-2P.**

104 We previously found that neutralizing antibody titers against the Beta variant increased substantially in  
105 rats that had received three rather than two doses of MVC-COV1901 [17]. We therefore immunized hamsters  
106 with a third dose of one-fifth amount of MVC-COV1901, referred to as Group D (W + W + W), and  
107 examined the antibody responses against VoCs. As shown in Figure 2, five weeks after the third dose in  
108 Group D hamsters, NT<sub>50</sub> GMTs were 4302, 1217, 281, 377, and 1368 against the wildtype, Alpha, Beta,  
109 Gamma, and Delta variants, respectively. The neutralizing titers against the Alpha, Beta, Gamma, and Delta  
110 variants had a 3.54-, 15.30-, 11.41- and 3.14-fold decrease, respectively, compared to that of the wildtype.  
111 Compared to Group A hamsters (which only received two doses), the neutralizing antibody titers in Group D  
112 hamsters against VoCs increased substantially with the additional third dose. The third dose not only  
113 increased the neutralizing antibody titers against the Delta variant but also boosted neutralizing antibody titers  
114 against the Beta and Gamma variants compared to the W+W group.

115 We also explored the possibility of using the Beta variant version of S-2P adjuvanted with CpG 1018  
116 and aluminum hydroxide as the third dose in Group E (W + W + B). As shown in Figure 2, at five weeks after  
117 the third injection of Group E hamsters, NT<sub>50</sub> GMTs were 6643, 1889, 1034, 1306, and 3595 against the  
118 wildtype, Alpha, Beta, Gamma, and Delta variants, respectively. Compared to the neutralizing titer against the  
119 wildtype, that against the Alpha, Beta, Gamma, and Delta variants had a 3.52-, 6.42-, 5.09- and 1.85-fold  
120 reduction, respectively. Two doses of wildtype S-2P combined with CpG and aluminum hydroxide followed  
121 by third dose of the adjuvanted Beta variant S-2P induced the *best* neutralization effect against the wildtype

122 and all of the VoCs tested when compared to the other groups, especially against the Delta variant. The dosing  
123 regimens in Groups A to E resulted in a 1.9-3.8-fold lower NT<sub>50</sub> GMT against the Delta variant than against  
124 the wildtype; however, the NT<sub>50</sub> titers against the wildtype were different in each group. Unexpectedly, the  
125 Beta variant of S-2P appears to be the most suitable candidate for the third dose booster.

126 Pseudovirus neutralization assays were performed with lentivirus pseudo-typed with spike protein from  
127 the wildtype, Alpha, Beta, Delta (B.1.617.2), Delta plus (AY.1), Lambda, and Mu variants. Similar to the  
128 results of live neutralization assay, the highest levels of neutralizing antibody titers against the wildtype and  
129 variants were all found in the group receiving two doses of wildtype S-2P followed by one dose of the Beta  
130 variant S-2P (Group E - Figure 3). All groups immunized with S-2P produced high levels of neutralizing  
131 antibody against pseudoviruses of wildtype, Alpha, and Beta variants (Groups A to E). However, only  
132 hamsters receiving two doses of wildtype S-2P followed by one dose of Beta variant S-2P (Group E) produced  
133 high levels of neutralizing antibody against Beta, Delta, Delta plus, and Mu variant pseudoviruses. In contrast,  
134 hamsters received two doses of S-2P (Groups A to C) had lower neutralizing antibody levels against the Beta,  
135 Delta, and Mu variant pseudoviruses, whereas Group B produced the lowest level of antibodies against the  
136 Delta variant pseudovirus (Figure 3). The pseudovirus neutralization assays were consistent with the live virus  
137 neutralization assays that showed the administration of two doses of wildtype S-2P followed by one dose of  
138 Beta variant S-2P provided the broadest spectrum of protection against wild-type SARS-CoV-2 and different  
139 variants, Alpha, Beta, Delta, Lambda, and Mu variants.

140 **Protection from the Delta variant challenge in hamsters immunized with two doses of MVC-COV1901**  
141 **or combined with a third dose of MVC-COV1901 or its Beta variant version of S-2P.**

142 Eight weeks after completion of the last immunization, hamsters were challenged with 10<sup>4</sup> PFU of the  
143 Delta variant and body weights were monitored up to six days post infection (d.p.i.). All the vaccinated groups  
144 showed no significant weight loss six days after virus challenge in contrast to the adjuvant control group that  
145 showed a steady decline in weight loss during this period (Figure 4). The protection in all vaccinated hamster  
146 groups was significant ( $p < 0.0001$ ) at 6 d.p.i. as compared to the weight loss seen in the adjuvant control  
147 group.

148 Lung viral load was measured by viral RNA and 50% tissue culture infectious dose (TCID<sub>50</sub>) assays.  
149 Figure 5A shows that at 3 d.p.i., lung viral RNA in Groups A to E hamsters were lower than in that of the  
150 adjuvant control group, but only in Group E was the lung viral RNA significantly lower than that in the  
151 adjuvant control group ( $p < 0.01$ ), while by 6 d.p.i., the viral RNA in all groups were significantly ( $p < 0.05$ )  
152 lower than that of the control. In contrast, the viral titers in all of the vaccinated hamsters measured by TCID<sub>50</sub>  
153 were significantly lower ( $p < 0.05$ ) than that of the adjuvant control group at 3 d.p.i. (Figure 5B). Note that the  
154 lung viral load in hamsters, both viral RNA and especially viral titer as measured by TCID<sub>50</sub>, dropped  
155 considerably at 6 d.p.i. in the negative control and adjuvant-only control groups likely due to hamsters' natural  
156 immune response against the virus (Figure 5B). We also found a strong negative correlation (Spearman  $r_s =$   
157  $-0.8227$ ) between NT<sub>50</sub> titer against the Delta variant from serum sampled five weeks after the final  
158 immunization and the number of viral genome at 3 d.p.i. (Figure 6). To examine the lung histopathology of  
159 the hamsters, lung necropsy sections were analyzed, and pathology scoring was tabulated at 3 d.p.i. or 6 d.p.i.  
160 (Figure 7). There were no differences at 3 d.p.i. between control and experimental groups; however, at 6 d.p.i.,  
161 the adjuvant control group had significantly ( $p < 0.01$ ) increased lung pathology including extensive and  
162 severe immune cell infiltration, hemorrhage, and diffuse alveolar damage, compared to groups receiving three  
163 doses of S-2P (Groups D and E).

164

## 165 Discussion

166 This study is our second hamster SARS-CoV-2 vaccination and challenge study. In the first study we  
167 showed that vaccination with both low and high dose of S-2P were effective against live SARS-CoV-2 virus  
168 challenge [13]. In the current study we extended our concept to examine the effect of a variant-based booster  
169 vaccinations followed by challenge with the Delta variant. Since Delta has emerged as one of the more  
170 infectious and dominant variant globally, we chose it as our model virus for challenge infection [18]. The  
171 results of the immunogenicity studies showed that immunization with either two doses of wildtype S-2P, or  
172 two doses of the Beta variant S-2P could not confer broad immunogenicity against all the variants tested.  
173 Wildtype S-2P was ineffective against the Beta and Gamma variants, whereas Beta variant S-2P induced

174 higher neutralizing titers against only the Beta variant (Figure 2). A *bivalent* mixture of both wildtype and  
175 Beta variant S-2Ps showed results similar to immunization with two doses of wildtype S-2P, but with slightly  
176 increased immunogenicity against the Beta and Gamma variants. Three doses of wildtype S-2P was able to  
177 boost the titers against both Beta and Gamma more than the bivalent vaccine and also increased the  
178 neutralization titers against the Alpha and Delta variants as well. Unexpectedly, our study showed that using  
179 the Beta variant S-2P as a third dose booster, induced the highest and broadest spectrum of neutralizing titers  
180 against all variants as well as the wildtype. Pseudovirus neutralization assay also confirmed that the above  
181 combination could also induce high levels of neutralizing titer to the Lambda and Mu variants as well (Figure  
182 3).

183 A recent study investigated the neutralization ability of convalescent and BNT162b2 vaccinated sera  
184 against pseudoviruses bearing variant spike proteins [19]. The Mu variant pseudovirus was the most refractory  
185 to neutralization by either types of sera, even more resistant to neutralization than that of the Beta variant [19].  
186 We found similar results with two doses of wildtype S-P (Group A) where the Mu variant pseudovirus had the  
187 lowest GMT compared to other variants in the group, and the GMTs of other groups all remained low except  
188 in Group E, where the Beta variant S-P was used as the third dose (Figure 3). It is of interest to note the ratio  
189 between the  $NT_{50}$  of the wildtype and Alpha variant remain relatively constant ranging from 3.52 to 3.79, and  
190 similar trend was observed for pseudovirus neutralization assay as well (Figures 2 and 3).

191 Comparing neutralization titers against different viruses is complicated, as the assays used are inherently  
192 dissimilar. Nevertheless, our immunogenicity results demonstrated a clear correlation between neutralization  
193 titers and lung viral clearance in the hamsters (Figure 5).

194 All five regimens of vaccination protected hamsters from weight loss induced by infection with the Delta  
195 variant (Figure 4). Notably, while group B had a relatively poor antibody response against the Delta variant,  
196 this group did not experience any weight loss or increase in lung pathology (Figures 2, 5, and 7). In addition,  
197 the viral titers for the Delta variant in Group B were significantly lower than those of the adjuvant control,  
198 suggesting that the amount of anti-Delta antibodies and/or T cell immune responses induced by two doses of  
199 the Beta variant S-2P could have reduced viral replication in the lungs and protected the hamsters from weight



200 loss and lung pathology (Figures 5 and 7). T cell immunity could also have played a role in providing  
201 protection against SARS-CoV-2 infection and viral clearance, in concert with humoral immunity in both  
202 vaccine- or infection-induced immunity [20-23]. Previous studies have shown that the memory T cell pool  
203 from prior infection or vaccination can be activated upon encountering heterologous virus if cross-reactive  
204 epitopes are shared between the two viruses [24]. The broad neutralizing ability of immunizing with the  
205 wildtype followed by Beta variant S-2P booster could also have been induced by cross-reactivity of memory  
206 B cells and T cells. This is similar to the concept of the original antigenic sin, in which previous exposure to a  
207 virus can cause memory cell responses to preferably secrete antibodies against the first virus after exposure to  
208 a similar virus strain due to shared epitopes [24]. Cross-reactivity of T cells have also been noted for rapid  
209 induction of immunity following infection or immunization with SARS-CoV-2 [19]. Since neutralizing  
210 antibodies induced by vaccines are polyclonal, they could also be cross-reactive with shared epitopes between  
211 different variants. Polyclonal antibodies induced by SARS-CoV-2 spike mRNA vaccine were profiled and  
212 were found to consist of a mixture of antibodies targeting the N-terminal domain (NTD) and the RBD, and  
213 they differ in their binding and neutralizing abilities [25, 26]. The re-stimulation of immunity may explain the  
214 low viral RNA titer in hamsters immunized in our study with either of the three-dose regimens. Further, the  
215 TCID<sub>50</sub> live virus titers in all groups were very low and almost undetectable in most instances (Figure 5). This  
216 may be due to the sensitivity of the TCID<sub>50</sub> assay itself, or the viral RNA assay may be detecting fragments of  
217 viral RNA from dead viruses as opposed to live replicating viruses. In future studies, subgenomic RNA  
218 detection should also be used to detect replicating viruses to corroborate the TCID<sub>50</sub> results. The establishment  
219 of correlates of protection using the relationship between NT<sub>50</sub> titer and viral RNA in a given hamster  
220 challenge model will help facilitate the expedited evaluation of vaccine combinations in future studies.

221 One limitation of this study is that we have not tested the vaccine's protection in vivo with other VoCs  
222 besides the Delta variant; the vaccine efficacy against other VoCs is inferred from the neutralizing antibody  
223 titers. The natural course of infection among the hamsters includes a convalescent state, so the model does not  
224 allow for evaluating mortality or severe disease as endpoints. T-cell functions were also not evaluated in the  
225 hamsters in this study, limiting our ability to assess the role of cellular immunity in providing protection. Two

226 recent studies investigated the effects of a booster dose of ChAdOx1 and mRNA-1273 [9, 27]. Administration  
227 of a third dose using the Beta variant version of mRNA-1273 (mRNA-1273.351) following two doses of  
228 mRNA-1273 increased immunogenicity against the Beta variant more than did three doses of mRNA-1273.  
229 The administration of either mRNA-1273 or mRNA1273-351 as third dose exponentially boosted  
230 immunogenicity against all variants tested compared to two doses of mRNA1273 [9]. Concerning similar  
231 studies with ChAdOx1 vaccine, the third dose boosted neutralization titers against the Beta and Delta variants  
232 as well as gamma-interferon levels [27]. These findings are similar to our results that showed a third dose of  
233 vaccination could boost an immune response against the virus as well as its variants. Our study also showed  
234 that a 3<sup>rd</sup> booster dose with both homologous (and especially with a heterologous Beta variant S-2P),  
235 increased immunogenicity against all the VoCs tested. Findings from this study provide evidence to support  
236 the further evaluation of both the original and a Beta variant S-2P vaccine as a booster dose for individuals  
237 fully vaccinated with MVC-COV1901 as well as other approved vaccines.

238

## 239 **Methods**

### 240 **Animals and ethical statements**

241 Female golden Syrian hamsters aged 8-10 weeks at study initiation were obtained from the National  
242 Laboratory Animal Center (Taipei, Taiwan). Animal immunizations were conducted in the Testing Facility for  
243 Biological Safety, TFBS Bioscience Inc., Taiwan. At three weeks following the final immunization, the  
244 animals were transferred to Academia Sinica, Taiwan, for SARS-CoV-2 challenge. All procedures in this  
245 study involving animals were conducted in a manner to avoid or minimize discomfort, distress, or pain to the  
246 animals and were carried out in compliance with the ARRIVE guidelines (<https://arriveguidelines.org/>). All  
247 animal work in the current study was reviewed and approved by the Institutional Animal Care and Use  
248 Committee (IACUC) with animal study protocol approval number TFBS2020-019 and Academia Sinica  
249 (approval number: 20-06-1483).

250

### 251 **Immunization and challenge of hamsters**

252 The study design is outlined in Figure 1. The hamsters were split into the following six groups with n =  
 253 10 for each group (Table 1):

254

| Groups                      | Source of S-2P protein                             |                                                    |                                                  |
|-----------------------------|----------------------------------------------------|----------------------------------------------------|--------------------------------------------------|
|                             | First immunization                                 | Second immunization                                | Third immunization                               |
| <b>A: W + W</b>             | Wildtype (1 µg)                                    | Wildtype (1 µg)                                    | -                                                |
| <b>B: B + B</b>             | Beta variant (1 µg)                                | Beta variant (1 µg)                                | -                                                |
| <b>C: (W + B) + (W + B)</b> | Wildtype (0.5µg) and Beta variant (0.5µg) bivalent | Wildtype (0.5µg) and Beta variant (0.5µg) bivalent | -                                                |
| <b>D: W + W + W</b>         | Wildtype (1 µg)                                    | Wildtype (1 µg)                                    | Wildtype (1 µg)                                  |
| <b>E: W + W + B</b>         | Wildtype (1 µg)                                    | Wildtype (1 µg)                                    | Beta variant (1 µg)                              |
| <b>F: Adjuvant control</b>  | CpG 1018 (150 µg) and aluminum hydroxide (75 µg)   | CpG 1018 (150 µg) and aluminum hydroxide (75 µg)   | CpG 1018 (150 µg) and aluminum hydroxide (75 µg) |

255

256 Hamsters in group A were vaccinated on days 22 and 43 with 1 µg of S-2P protein derived from the  
 257 wildtype. Hamsters in group B were vaccinated on days 22 and 43 with 1 µg of S-2P protein derived from  
 258 Beta variant. Hamsters in group C were vaccinated on days 22 and 43 with a mixture of the wildtype (0.5 µg)  
 259 and Beta variant (0.5 µg) of S-2P protein (bivalent vaccine). Hamsters in group D were vaccinated on days 1,  
 260 22, and 43 with 1 µg of S-2P protein derived from the wildtype. Hamsters in group E were vaccinated on days  
 261 1 and 22 with 1 µg of wildtype S-2P protein, and on day 43 with 1 µg of S-2P protein derived from the Beta  
 262 variant. Hamsters in group F served as an adjuvant control and were vaccinated with only 150 µg of CpG  
 263 1018 and 75 µg of aluminum hydroxide (alum) on days 1, 22 and 43. All immunization with S-2P were  
 264 adjuvanted with 150 µg of CpG 1018 and 75 µg of alum. Serum samples were collected five weeks after the  
 265 final immunization and immunogenicity was determined by neutralization assay with SARS-CoV-2 virus and  
 266 the variants. Approximately three weeks after the serum sampling (53 days after the final immunization),

267 hamsters were challenged with the SARS-CoV-2 Delta variant (TCDC#1144) and then sacrificed at 3 d.p.i. (n  
268 = 5 per group) or 6 d.p.i. (n = 5 per group) for analyses of lung viral loads, lung TCID<sub>50</sub>. Body weight of  
269 individual hamsters were tracked daily up to the time of sacrifice. Necropsy were performed with lungs of  
270 euthanized hamster and histopathology sectioning, staining, and scoring were done as described previously  
271 [13].

272

### 273 **Live SARS-CoV-2 and pseudovirus neutralization assay**

274 SARS-CoV-2 virus strains (Wuhan wildtype, Alpha, Beta, Gamma, and Delta variants) were used in live  
275 virus neutralization assay as described previously [18]. Pseudovirus with lentivirus pseudotyped with S  
276 proteins of the wildtype, Alpha (B.1.1.7), Beta (B.1.351), Delta (B.1.617.2), Delta plus (AY.1), Lambda  
277 (C.37), and Mu (B.1.621) variants were conducted as previously described [12].

278

### 279 **Viral RNA quantification and cell culture infectious assay (TCID<sub>50</sub>)**

280 Quantification of lung viral load by real-time PCR and TCID<sub>50</sub> assay were performed as previously  
281 reported [13].

282

### 283 **Statistical analysis**

284 The analysis package in Prism 6.01 (GraphPad) was used for statistical analysis. Spearman's rank  
285 correlation coefficient and linear regression were calculated for Figure 5. Kruskal-Wallis with corrected  
286 Dunn's multiple comparisons test and two-way ANOVA with Dunnett test for multiple comparison were used  
287 to calculate significance in Figures 2 to 4 where appropriate. \* = p < 0.05, \*\* = p < 0.01, \*\*\* = p < 0.001,  
288 \*\*\*\* = p < 0.0001

289

### 290 **Acknowledgements**

291 We would like to thank the team members at TFBS Bioscience Incorporation for their assistance with  
292 hamster housing and the immunization process, We also thank Academia Sinica for the use of their Biosafety

293 Level 3 Facility and for providing the environment needed for handling and performing the SARS-CoV-2  
294 hamster challenge and live SARS-CoV-2 neutralization assays. We also thank Michael D. Malison and Han  
295 van den Bosch for reviewing and providing helpful inputs with the manuscript.

296

## 297 **Author Contributions**

298 T.-Y. K., C.-C. W., and W.-H. T. produced the wildtype and Beta variant versions of S-2P antigens used  
299 in the study. T.-Y. K., C.-E. L., Y.-J. L., M.-Y. L., C.-C. W., W.-H. T., J. D. C., P. T., Y.-S. C., and C. C.  
300 designed the study and experiments. Y.-J. L. and Y.-S. C. supervised the experiments at TFBS Bioscience and  
301 Academia Sinica. Y.-J. L., M.-Y.-L., Y.-S. C., and L. T.-C. L. analyzed the results. M.-Y. L., Y.-S. C., and L.  
302 T.-C. L. drafted the manuscript. All authors reviewed and approved of the final version of the manuscript.

303

## 304 **Competing Interests**

305 C. C., T.-Y. K., C.-C. W., W.-H. T., C.-E. L., Y.-J. L., and M.-Y. L. are co-inventors for US provisional  
306 patent applications 63/240,408, 63/240,080, 63/248,189 and 63/251,741.

307

308

## 309 **References**

- 310 1. World Health Organization. Tracking SARS-CoV-2 variants. Available at:  
311 <https://www.who.int/en/activities/tracking-SARS-CoV-2-variants/>. Accessed 15 September, 2021.
- 312 2. Choi A, Koch M, Wu K, *et al.* Serum neutralizing activity of mRNA-1273 against SARS-CoV-2  
313 variants. bioRxiv. 2021 Jan 1.
- 314 3. Jongeneelen M, Kaszas K, Veldman D, *et al.* Ad26. COV2. S elicited neutralizing activity against Delta  
315 and other SARS-CoV-2 variants of concern. bioRxiv. 2021 Jan 1.
- 316 4. Liu C, Ginn HM, Dejnirattisai W, *et al.* Reduced neutralization of SARS-CoV-2 B. 1.617 by vaccine and  
317 convalescent serum. Cell. 2021 Aug 5;184(16):4220-36.
- 318 5. Emary KR, Golubchik T, Aley PK, *et al.* Efficacy of ChAdOx1 nCoV-19 (AZD1222) vaccine against

- 319 SARS-CoV-2 variant of concern 202012/01 (B. 1.1. 7): an exploratory analysis of a randomized  
320 controlled trial. *The Lancet*. 2021 Apr 10;397(10282):1351-62.
- 321 6. Madhi SA, Baillie V, Cutland CL, *et al*. Efficacy of the ChAdOx1 nCoV-19 Covid-19 vaccine against  
322 the B. 1.351 variant. *New England Journal of Medicine*. 2021 May 20;384(20):1885-98.
- 323 7. Puranik A, Lenehan PJ, Silvert E, *et al*. Comparison of two highly-effective mRNA vaccines for  
324 COVID-19 during periods of Alpha and Delta variant prevalence. *medRxiv*. 2021 Aug 8.
- 325 8. Lopez Bernal J, Andrews N, Gower C, *et al*. Effectiveness of Covid-19 vaccines against the B. 1.617. 2  
326 (delta) variant. *New England Journal of Medicine*. 2021 Jul 21.
- 327 9. Wu K, Choi A, Koch M, *et al*. Preliminary analysis of safety and immunogenicity of a SARS-CoV-2  
328 variant vaccine booster. *medRxiv*. 2021 Jan 1.
- 329 10. Sagonowsky E. “Moderna, citing variants and waning immunity, expects COVID-19 boosters to become  
330 a fact of life”. Aug 5, 2021. Available at:  
331 [https://www.fiercepharma.com/pharma/moderna-citing-variants-and-waning-immunity-expects-covid-19](https://www.fiercepharma.com/pharma/moderna-citing-variants-and-waning-immunity-expects-covid-19-boosters-to-become-a-fact-of-life)  
332 [-boosters-to-become-a-fact-of-life](https://www.fiercepharma.com/pharma/moderna-citing-variants-and-waning-immunity-expects-covid-19-boosters-to-become-a-fact-of-life). Accessed 17 September, 2021.
- 333 11. Pfizer and BioNTech. “Pfizer and BioNTech Provide Update on Booster Program in Light of the  
334 Delta-Variant”. July 8, 2021. Available at:  
335 [https://cdn.pfizer.com/pfizercom/2021-07/Delta\\_Variant\\_Study\\_Press\\_Statement\\_Final\\_7.8.21.pdf?IPp](https://cdn.pfizer.com/pfizercom/2021-07/Delta_Variant_Study_Press_Statement_Final_7.8.21.pdf?IPpR1xZjIwvaUMQ9sRn2FkePcBiRPGqw)  
336 [R1xZjIwvaUMQ9sRn2FkePcBiRPGqw](https://cdn.pfizer.com/pfizercom/2021-07/Delta_Variant_Study_Press_Statement_Final_7.8.21.pdf?IPpR1xZjIwvaUMQ9sRn2FkePcBiRPGqw). Accessed 17 September, 2021.
- 337 12. Kuo TY, Lin MY, Coffman RL, *et al*. Development of CpG-adjuvanted stable prefusion SARS-CoV-2  
338 spike antigen as a subunit vaccine against COVID-19. *Scientific reports*. 2020 Nov 18;10(1):1-0.
- 339 13. Lien CE, Lin YJ, Chen C, *et al*. CpG-adjuvanted stable prefusion SARS-CoV-2 spike protein protected  
340 hamsters from SARS-CoV-2 challenge. *Scientific reports*. 2021 Apr 22;11(1):1-7.
- 341 14. Hsieh SM, Liu WD, Huang YS *et al*. Safety and Immunogenicity of a Recombinant Stabilized Prefusion  
342 SARS-CoV-2 Spike Protein Vaccine (MVC-COV1901) Adjuvanted With CpG 1018 and Aluminum  
343 Hydroxide in Healthy Adults: A Phase 1, Dose-Escalation Study. *EClinicalMedicine*. June 26, 2021.
- 344 15. Szu-Min H, Liu MC, Chen YH, *et al*. Safety and Immunogenicity of CpG 1018 and Aluminum

- 345 Hydroxide-Adjuvanted SARS-CoV-2 S-2P Protein Vaccine MVC-COV1901: A Large-Scale  
346 Double-Blind, Randomised, Placebo-Controlled Phase 2 Trial. medRxiv. 2021 Jan 1.
- 347 16. Blanchard B and Lee Y. “Taiwan approves Medigen's COVID-19 vaccine candidate”. July 19, 2021.  
348 Available at:  
349 [https://www.reuters.com/world/asia-pacific/taiwan-approves-production-medigens-covid-19-vaccine-can-](https://www.reuters.com/world/asia-pacific/taiwan-approves-production-medigens-covid-19-vaccine-candidate-2021-07-19/)  
350 [didate-2021-07-19/](https://www.reuters.com/world/asia-pacific/taiwan-approves-production-medigens-covid-19-vaccine-candidate-2021-07-19/)”. Accessed September 17, 2021.
- 351 17. Lien CE, Kuo TY, Lin YJ, *et al.* Evaluating the neutralizing ability of a CpG-adjuvanted S-2P subunit  
352 vaccine against SARS-CoV-2 Variants of Concern. Clin Infect Dis. 2021. In press.
- 353 18. Julia LM, Ginger T, Alaa AL, *et al.* Delta Variant Report, outbreak.info. Available online:  
354 <https://outbreak.info/situation-reports/delta>. Accessed September 17, 2021.
- 355 19. Uriu K, Kimura I, Shirakawa K, *et al.* Ineffective neutralization of the SARS-CoV-2 Mu variant by  
356 convalescent and vaccine sera. bioRxiv. 2021 Jan 1.
- 357 20. Loyal L, Braun J, Henze L, *et al.* Cross-reactive CD4+ T cells enhance SARS-CoV-2 immune responses  
358 upon infection and vaccination. medRxiv. 2021 Jan 1.
- 359 21. Oberhardt V, Luxenburger H, Kemming J, *et al.* Rapid and stable mobilization of CD8+ T cells by  
360 SARS-CoV-2 mRNA vaccine. Nature. 2021 Jul 28:1-6.
- 361 22. Ewer KJ, Barrett JR, Belij-Rammerstorfer S, *et al.* T cell and antibody responses induced by a single  
362 dose of ChAdOx1 nCoV-19 (AZD1222) vaccine in a phase 1/2 clinical trial. Nature medicine. 2021  
363 Feb;27(2):270-8.
- 364 23. Neidleman J, Luo X, Mgregor M, *et al.* mRNA vaccine-induced SARS-CoV-2-specific T cells recognize  
365 B. 1.1. 7 and B. 1.351 variants but differ in longevity and homing properties depending on prior  
366 infection status. bioRxiv. 2021 Jan 1.
- 367 24. Welsh RM and Selin LK. No one is naive: the significance of heterologous T-cell immunity. Nature  
368 Reviews Immunology. 2002 Jun;2(6):417-26.
- 369 25. Amanat F, Thapa M, Lei T, *et al.* The plasmablast response to SARS-CoV-2 mRNA vaccination is  
370 dominated by non-neutralizing antibodies that target both the NTD and the RBD. medRxiv. 2021 March

- 371 9.
- 372 26. Tong P, Gautam A, Windsor I, *et al.* Memory B cell repertoire for recognition of evolving SARS-CoV-2
- 373 spike. bioRxiv. 2021 March 10.
- 374 27. Flaxman A, Marchevsky NG, Jenkin D, *et al.* Reactogenicity and immunogenicity after a late second
- 375 dose or a third dose of ChAdOx1 nCoV-19 in the UK: a substudy of two randomised controlled trials
- 376 (COV001 and COV002). The Lancet. 2021 Sep 1.

## 377 Figures

378

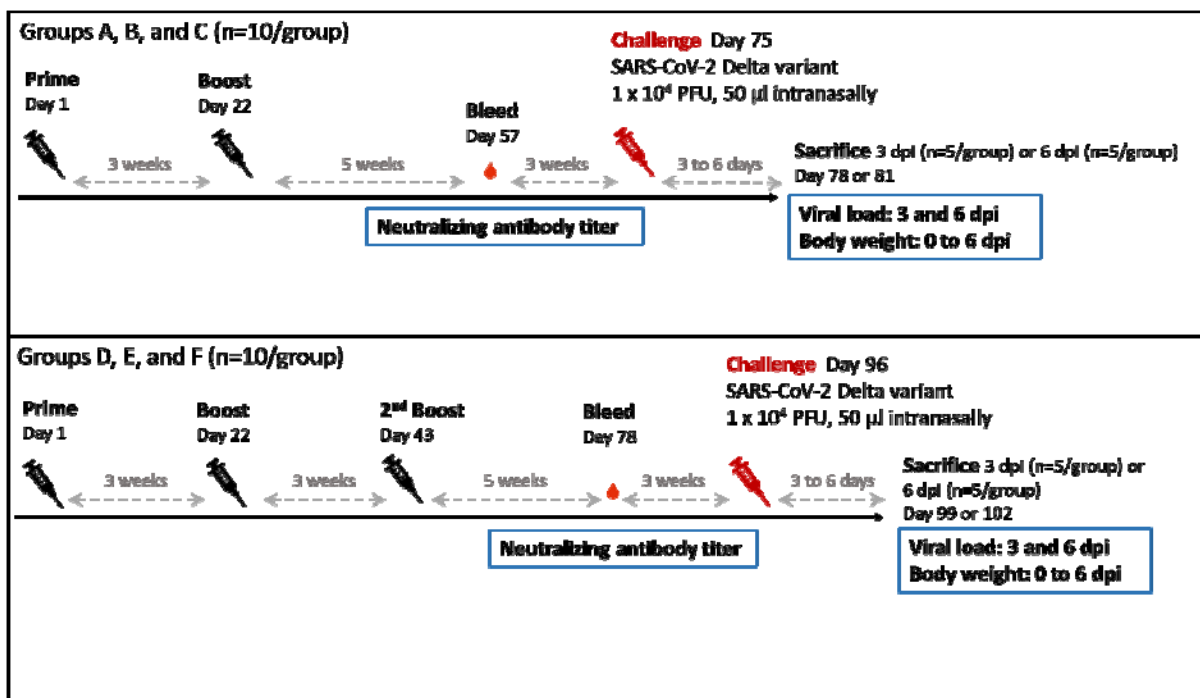

379

380 **Figure 1. Study design of the hamster challenge study.**

381 Hamsters (N=10 per group) were immunized twice (groups A, B, and C) or three times (groups D, E, and

382 F) at three weeks apart and serum samples were taken for immunogenicity assays five weeks after the final

383 immunization. Eight weeks after the final immunization, hamsters were challenged with  $10^4$  PFU of

384 SARS-CoV-2 Delta variant. The animals were euthanized on the third or sixth day after infection for necropsy

385 and tissue sampling to determine viral load. Body weight of individual hamster were tracked daily up to the

386 time of sacrifice.

387



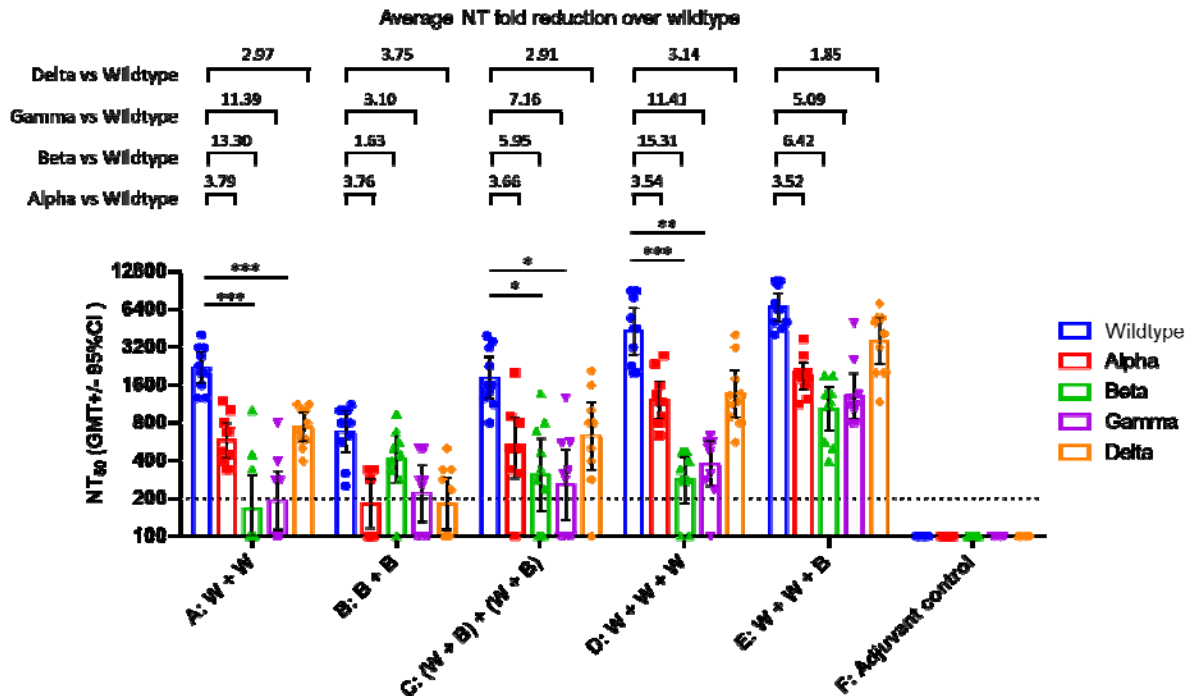

388

389

390

391

392

393

394

395

396

397

398

**Figure 2. Neutralizing antibody titers with live SARS-CoV-2 neutralization assay in hamsters five weeks after the final immunization.** Hamsters were immunized as in Figure 1. Five weeks after the final immunization (second immunization for groups A, B, and C; third immunization for groups D, E, and F), serum samples were taken for neutralization assays against live SARS-CoV-2 ancestral strain and Alpha, Beta, Gamma, and Delta variants. Results are shown as bars indicating the NT<sub>50</sub> GMT with individual values displayed as symbols and error bars showing the 95% confidence intervals. Average fold reduction in GMT of variants against the ancestral strain were calculated and shown above brackets above the corresponding bars. W: Wildtype S-2P; B: Beta variant S-2P; W + B: bivalent mixture of wildtype and Beta variant S-2Ps. Statistical significance was calculated with Kruskal-Wallis test with corrected Dunn's multiple comparisons test.

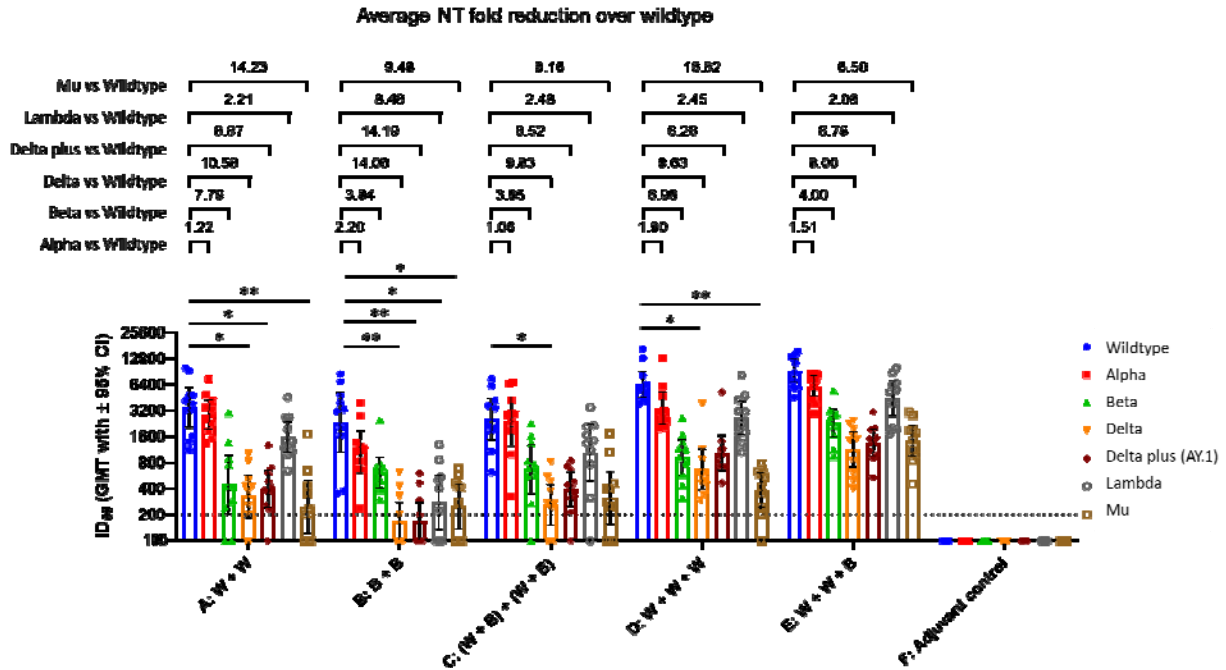

399

400 **Figure 3. Neutralizing antibody titers with pseudovirus neutralization assay in hamsters five weeks**  
 401 **after the final immunization.** Hamsters were immunized and serum samples taken as in Figure 2. The  
 402 samples were tested against lentivirus pseudotyped with the spike proteins of SARS-CoV-2 wildtype, Alpha,  
 403 Beta, Delta (B.1.617.2), Delta plus (AY.1), Lambda, and Mu variants. Results are shown as bars indicating the  
 404 NT<sub>50</sub> GMT with individual values displayed as symbols and error bars showing the 95% confidence intervals.  
 405 Average fold reduction in GMT of variants against the ancestral strain were calculated and shown above  
 406 brackets above the corresponding bars. Statistical significance was calculated with Kruskal-Wallis with  
 407 corrected Dunn's multiple comparisons test.

408

409

410

411

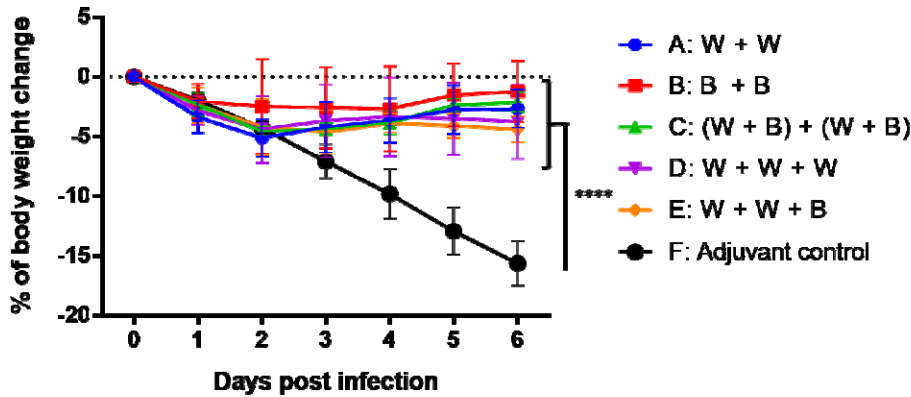

412

413 **Figure 4. Change in body weight in hamsters after infection with SARS-CoV-2 Delta variant.**

414 Hamsters were challenged with SARS-CoV-2 Delta variant eight weeks after the final immunization. The  
 415 body weights of individual hamsters were tracked daily up to the time of euthanizing at six days post infection.  
 416 (n = 5/group). Results are shown as percent of weight relative to the day of challenge (day 0). Statistical  
 417 significance was calculated with two-way ANOVA with Dunnett multiple comparison test with adjuvant only  
 418 as a control.

419

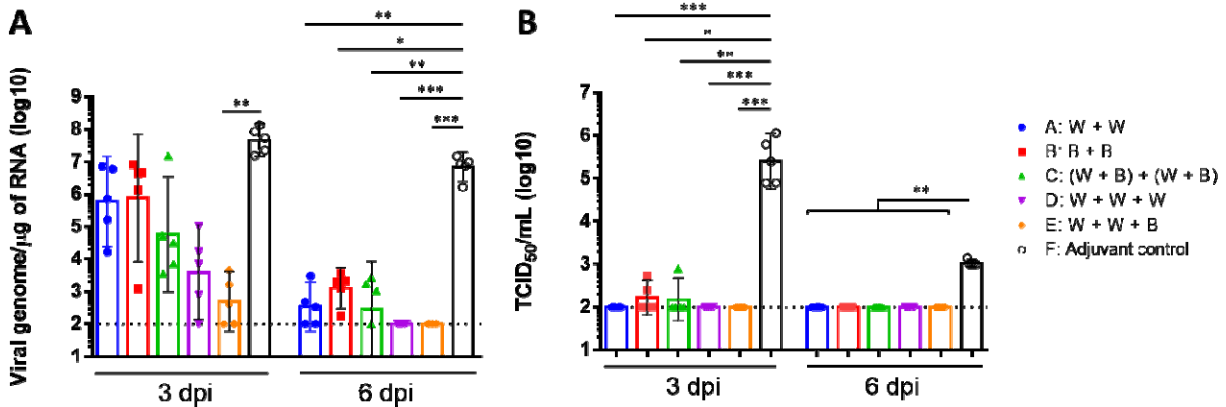

420

421 **Figure 5. Viral load in hamsters three or six days post infection with SARS-CoV-2 Delta variant.**

422 The hamsters were euthanized at three or six days (n = 5/group) after infection and lung tissue samples  
 423 were collected for viral load determination by “A” quantitative PCR of viral genome RNA, and “B” TCID<sub>50</sub>  
 424 assay for virus titer. Results are presented as geometric mean values with error bars representing 95%  
 425 confidence intervals. Statistical significance was calculated with Kruskal-Wallis corrected Dunn’s multiple  
 426 comparisons test.

427

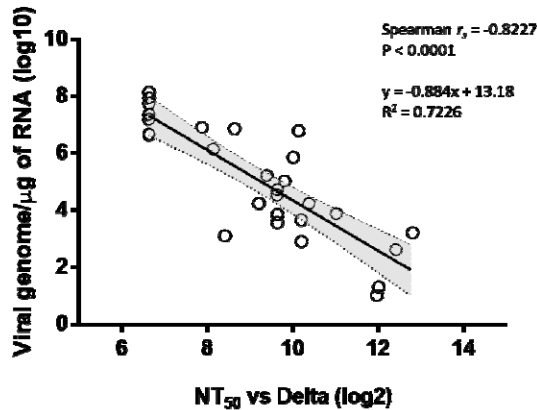

428

429

430

431

432

433

434

**Figure 6. Correlation between SARS-CoV-2 viral genome copy numbers and NT<sub>50</sub> titers against the Delta variant.** Values of viral genome copy numbers 3 days post infection and NT50 titers against the Delta variant five days after the final immunization were tabulated (n = 29). Spearman's rank correlation coefficient and linear regression were calculated with dotted bands and shaded area representing the 95% confidence bands of the linear regression line.

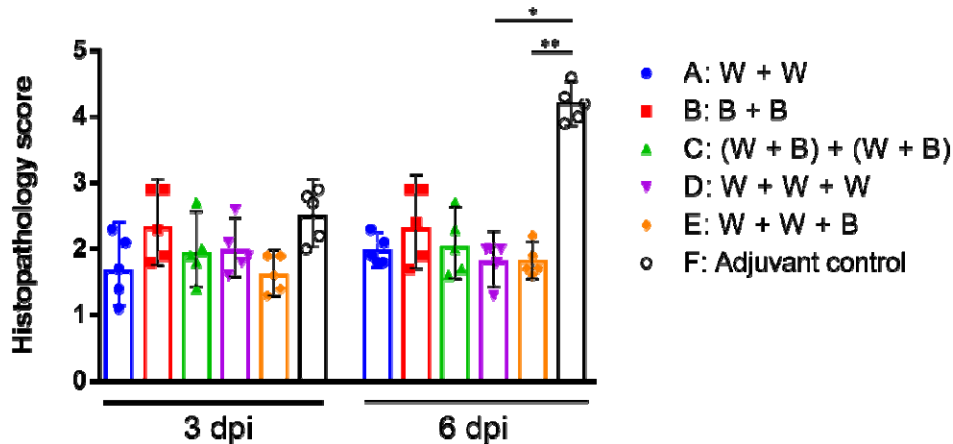

435

436

437

438

439

440

441

442

**Figure 7. Lung histopathology scoring in hamsters at 3 or 6 days post infection with SARS-CoV-2 Delta variant.** The hamsters were challenged with SARS-CoV-2 Delta variant and euthanized at three or six days after infection as in Figure 5. Lung sections were prepared and stained and histopathology scores were calculated. Results are presented as mean with error bars representing standard deviation. Statistical significance was calculated with Kruskal-Wallis corrected Dunn's multiple comparisons test.

Groups A, B, and C (n=10/group)

**Prime**

Day 1

**Boost**

Day 22

**Bleed**

Day 57

**Challenge** Day 75

SARS-CoV-2 Delta variant

$1 \times 10^4$  PFU, 50  $\mu$ l intranasally

**Sacrifice** 3 dpi (n=5/group) or 6 dpi (n=5/group)

Day 78 or 81

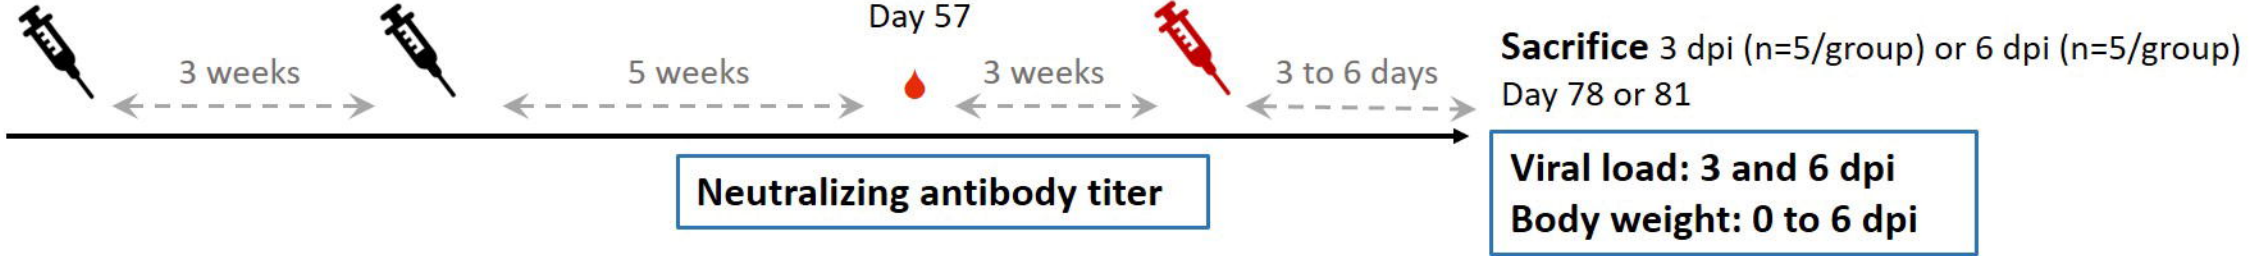

Groups D, E, and F (n=10/group)

**Prime**

Day 1

**Boost**

Day 22

**2<sup>nd</sup> Boost**

Day 43

**Bleed**

Day 78

**Challenge** Day 96

SARS-CoV-2 Delta variant

$1 \times 10^4$  PFU, 50  $\mu$ l intranasally

**Sacrifice** 3 dpi (n=5/group) or

6 dpi (n=5/group)

Day 99 or 102

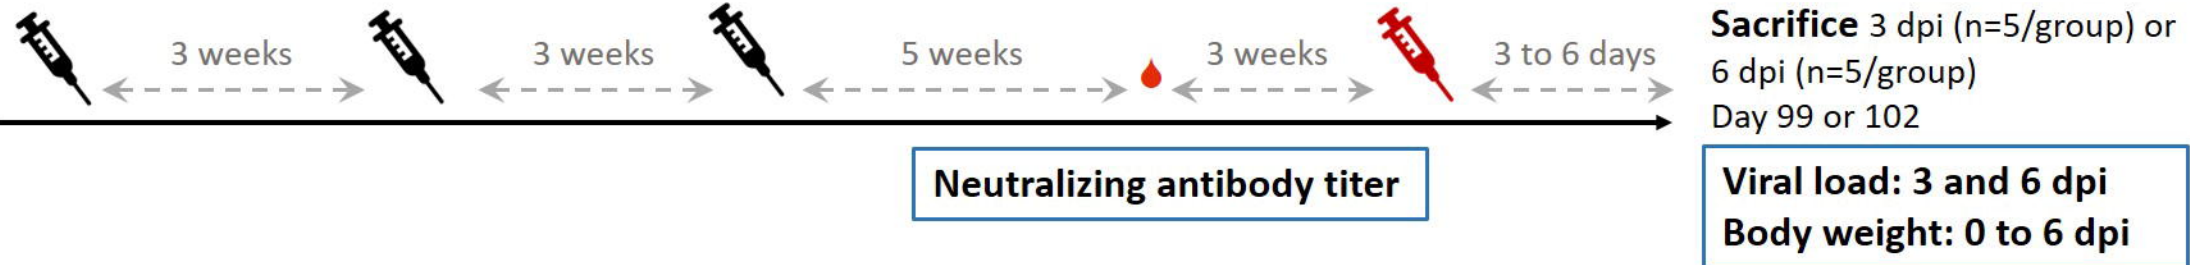

### Average NT fold reduction over wildtype

| Comparison        | Wildtype | Alpha | Beta | Gamma | Delta |
|-------------------|----------|-------|------|-------|-------|
| Delta vs Wildtype |          | 2.97  | 3.75 | 2.91  | 3.14  |
| Gamma vs Wildtype |          | 11.39 | 3.10 | 7.16  | 11.41 |
| Beta vs Wildtype  |          | 13.30 | 1.63 | 5.95  | 15.31 |
| Alpha vs Wildtype |          | 3.79  | 3.76 | 3.66  | 3.54  |

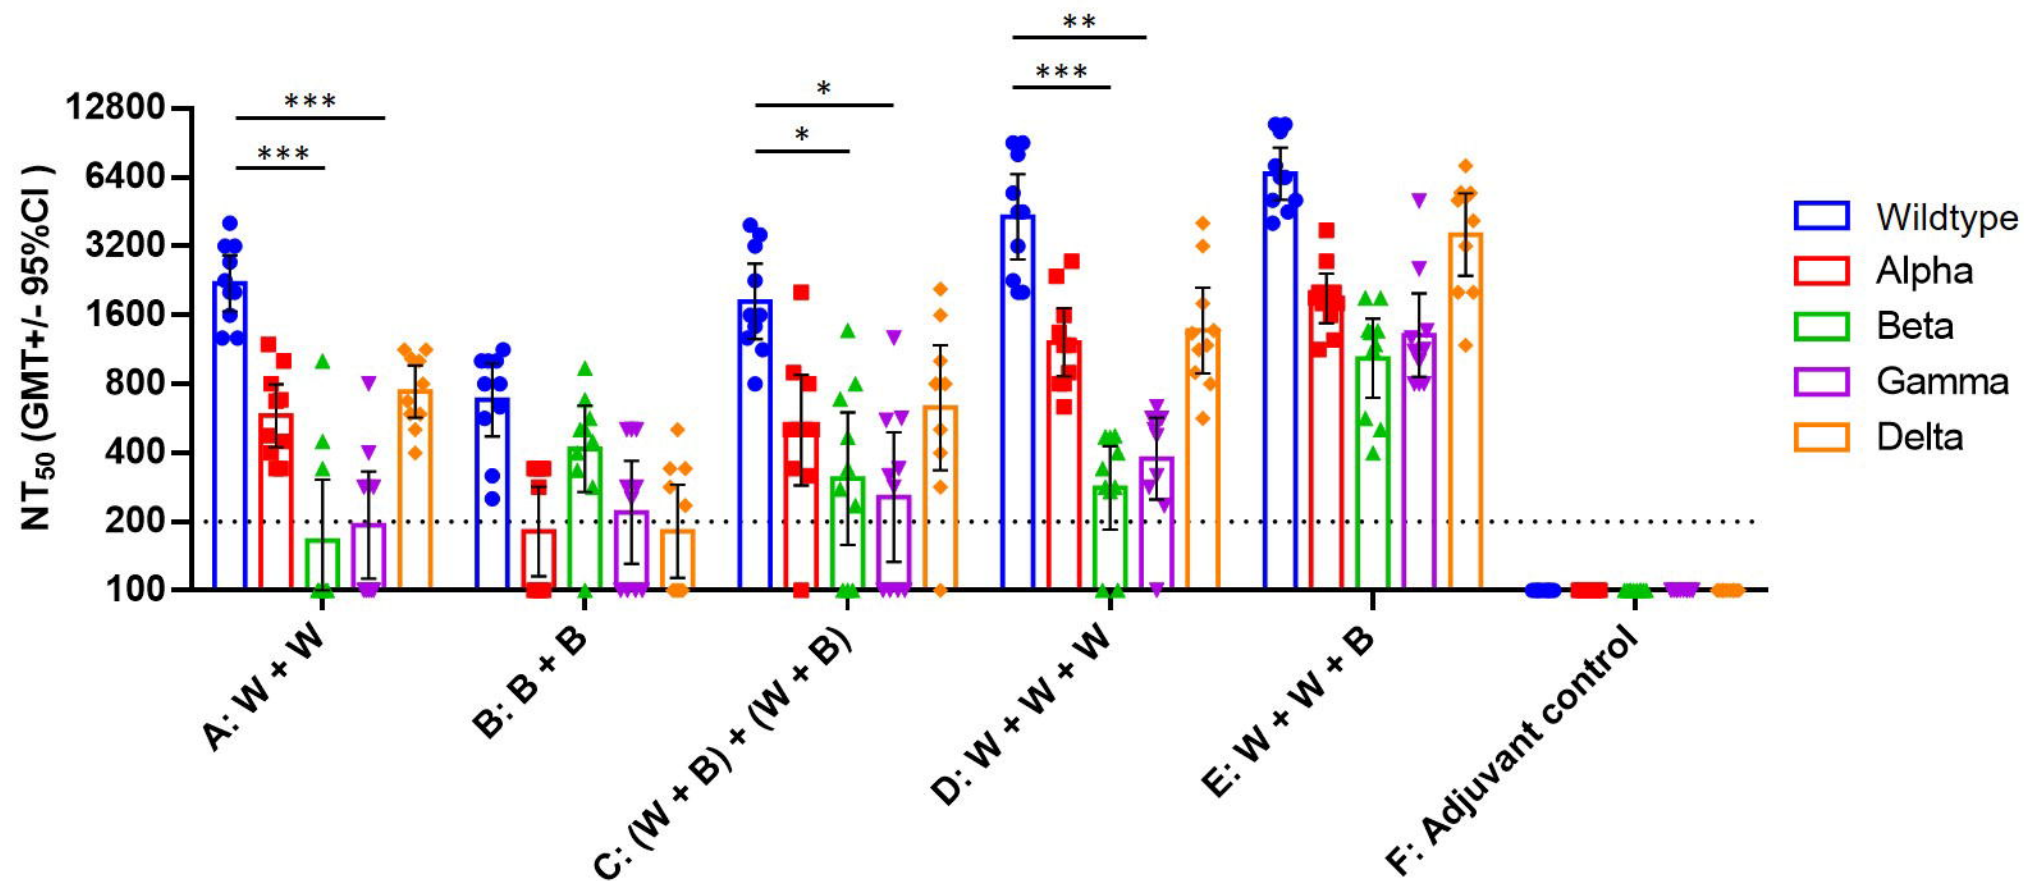

# Average NT fold reduction over wildtype

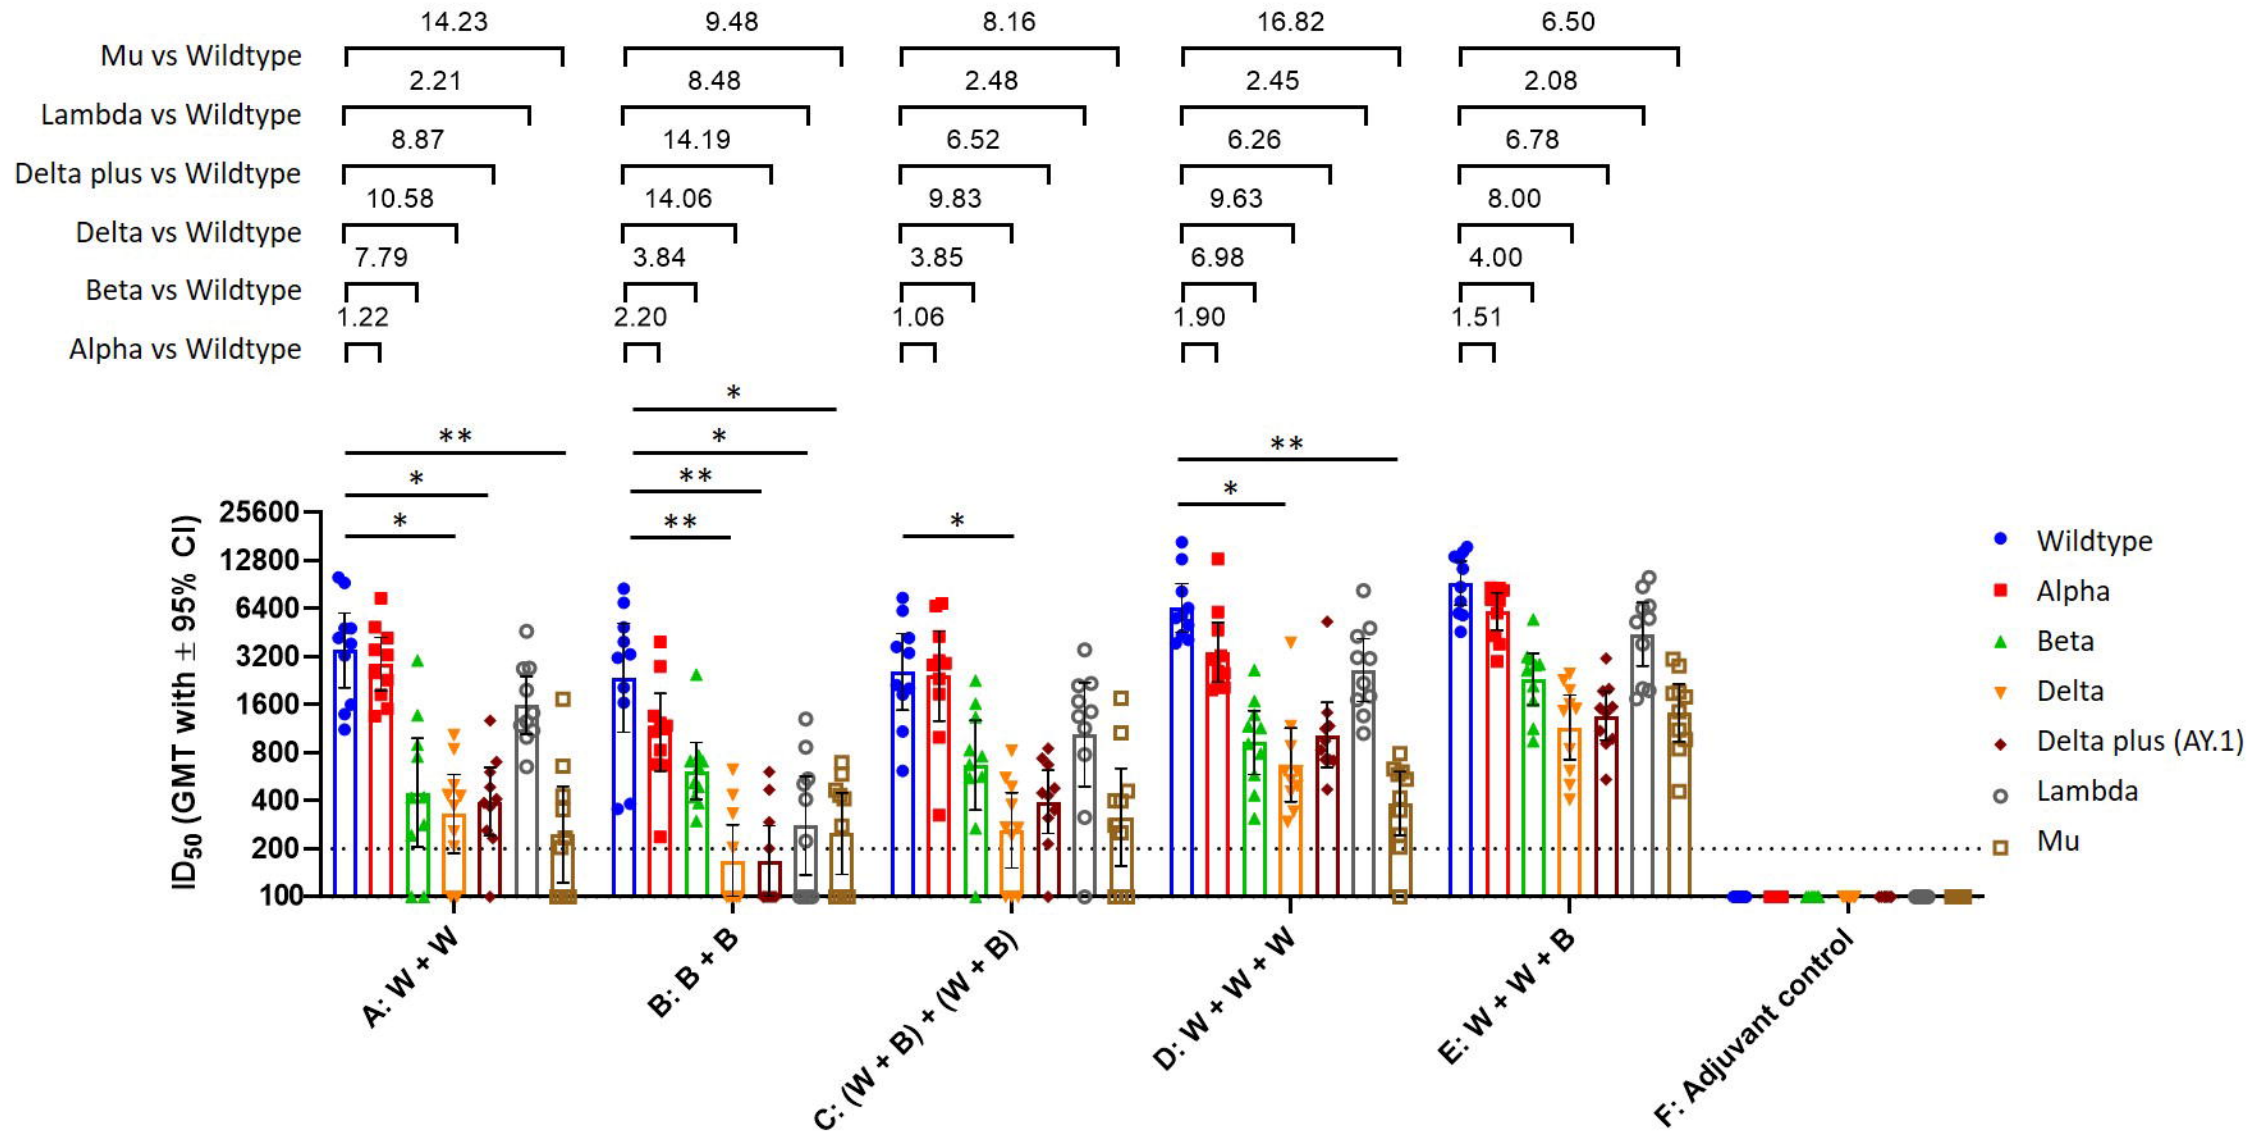

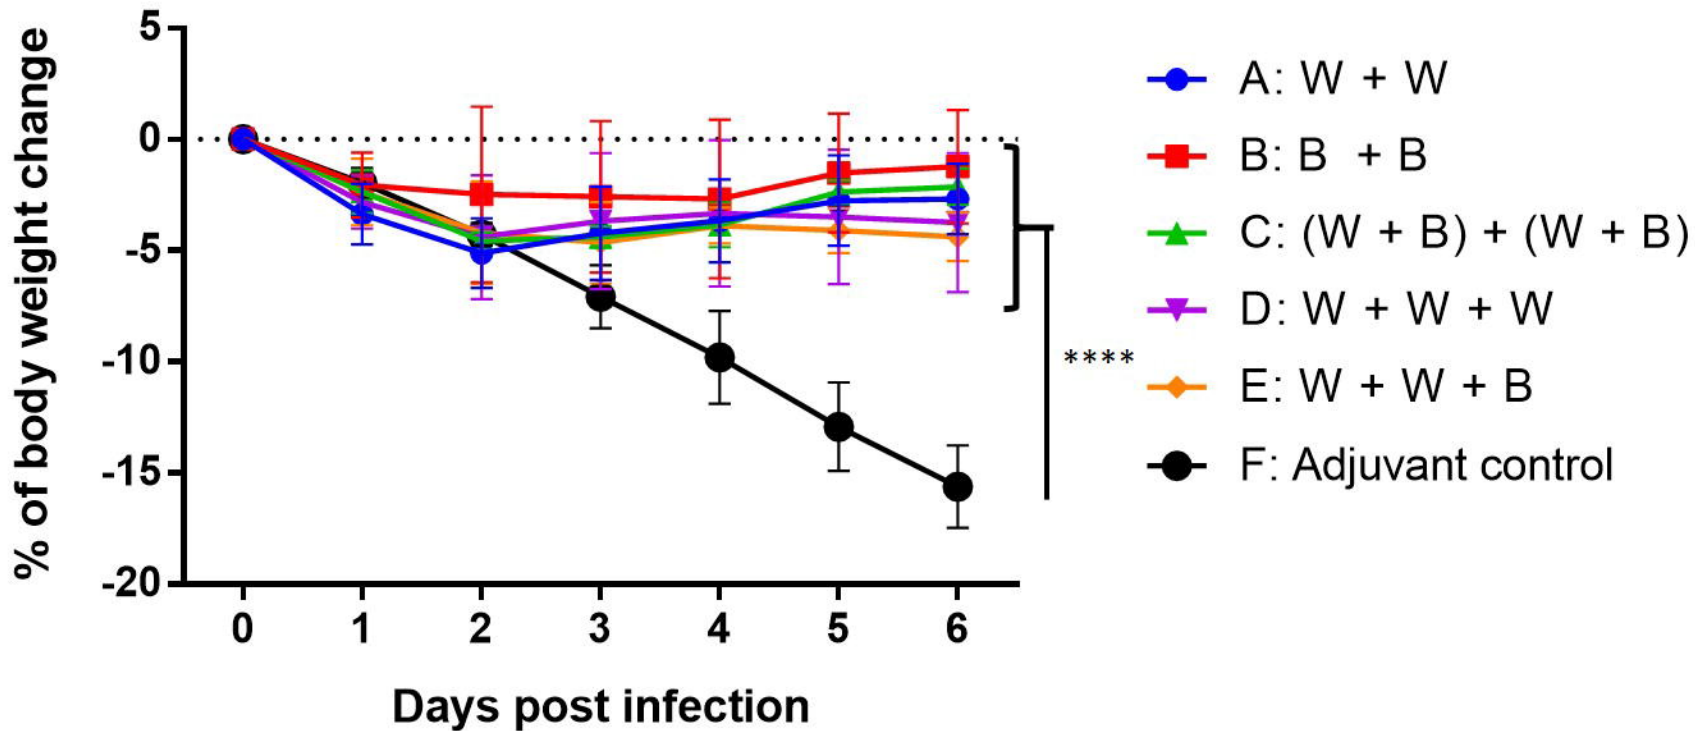



**A**Viral genome/ $\mu\text{g}$  of RNA ( $\log_{10}$ )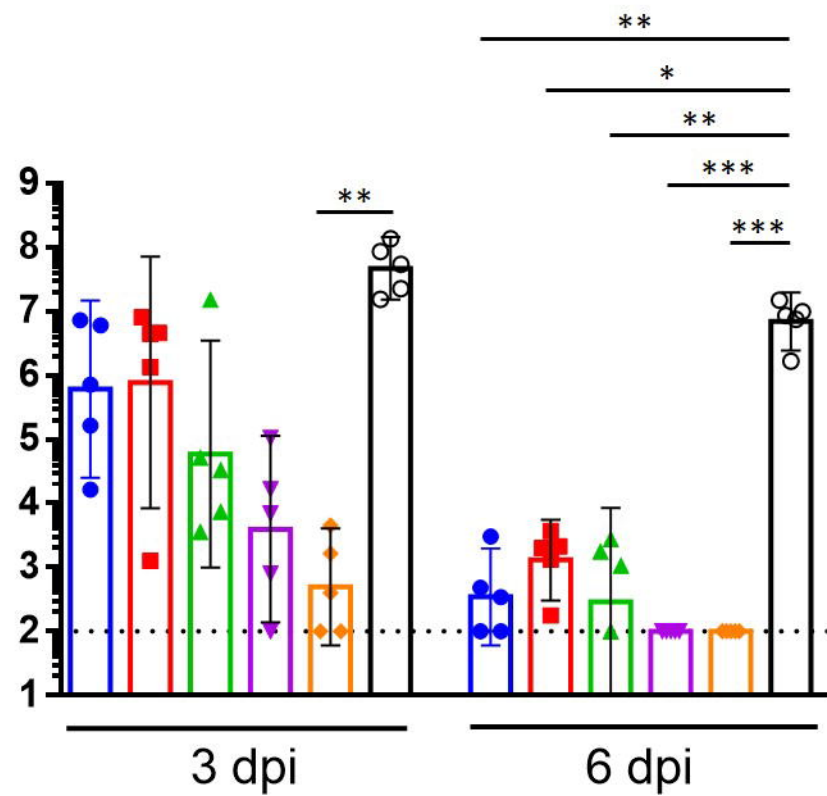**B**TCID<sub>50</sub>/mL ( $\log_{10}$ )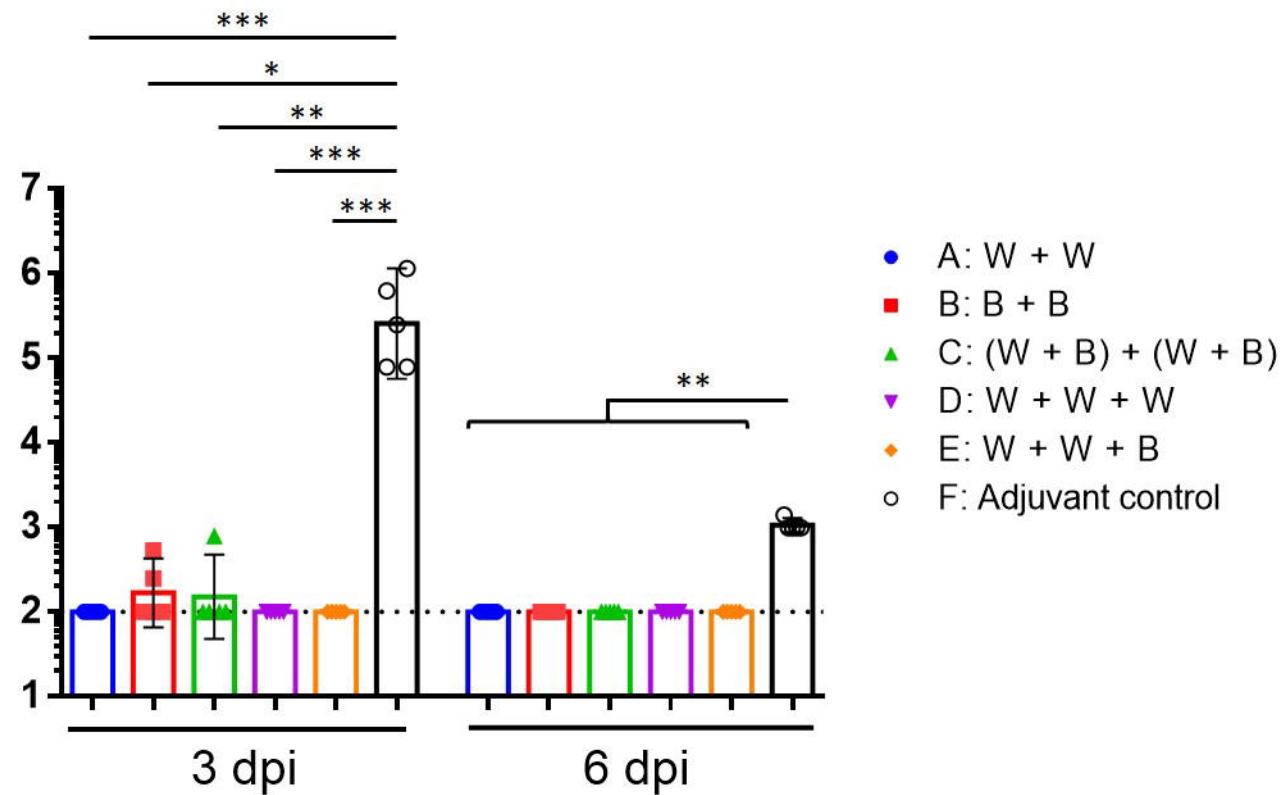

- A: W + W
- B: B + B
- ▲ C: (W + B) + (W + B)
- ▼ D: W + W + W
- ◆ E: W + W + B
- F: Adjuvant control

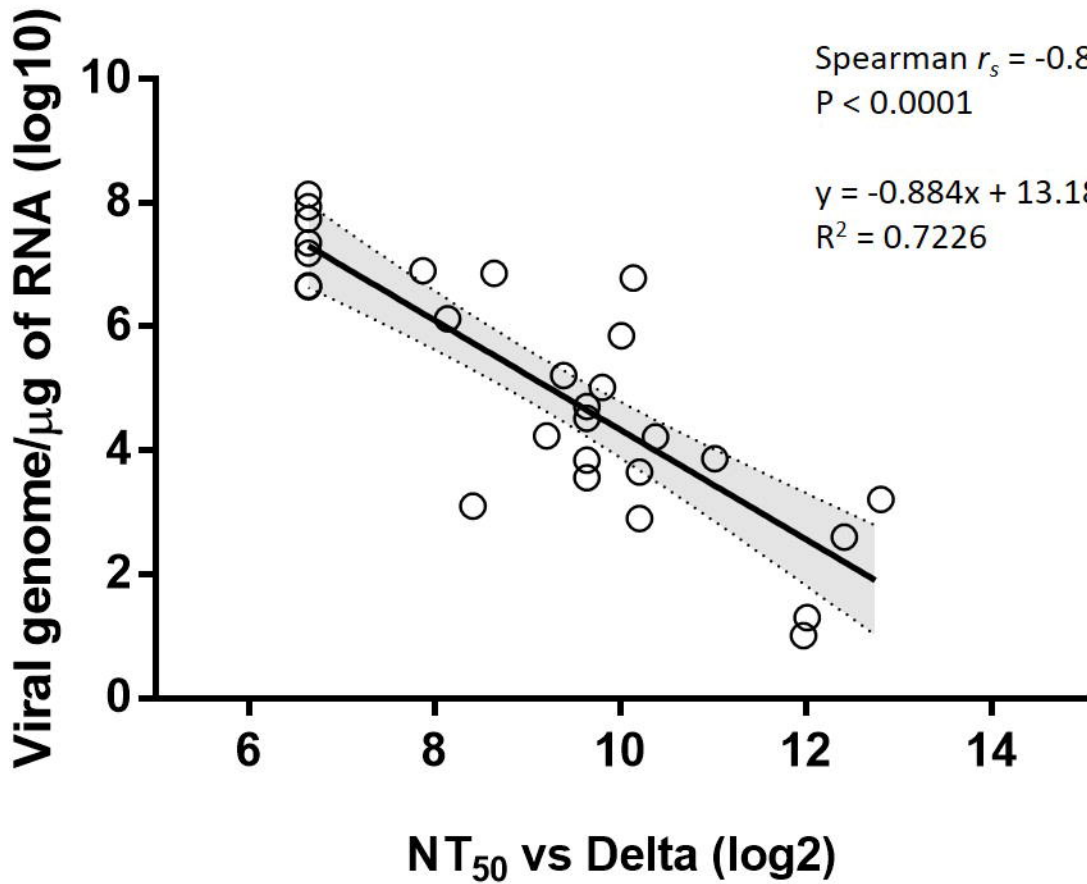

Histopathology score

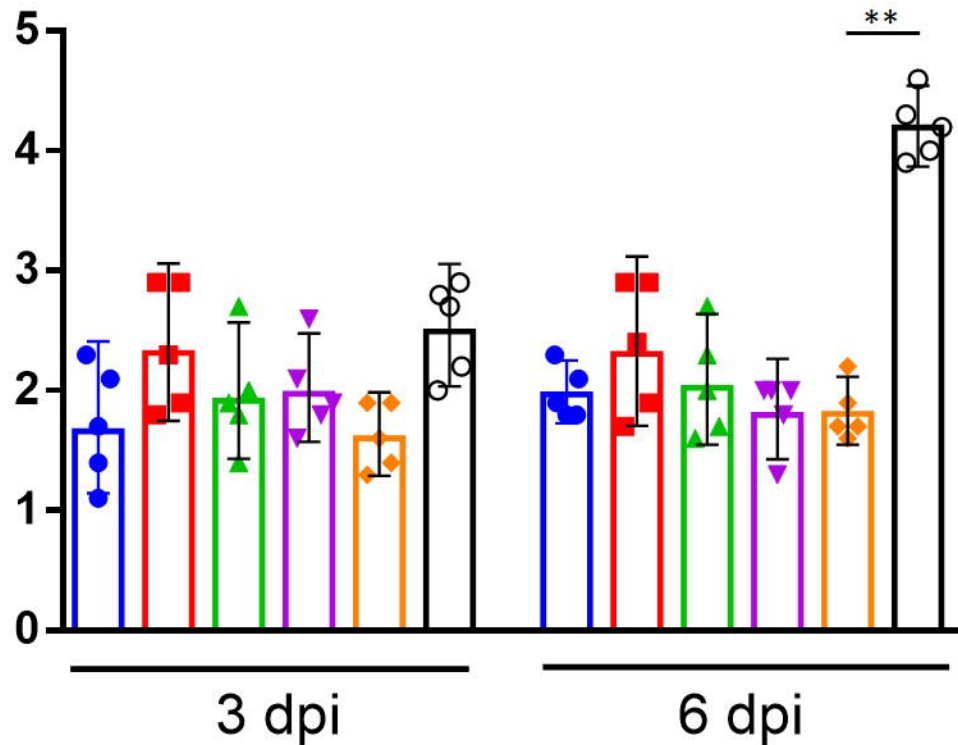

- A: W + W
- B: B + B
- ▲ C: (W + B) + (W + B)
- ▼ D: W + W + W
- ◆ E: W + W + B
- F: Adjuvant control
